# Supplementary material for: Manipulation of HSP70-SOD1 Expression Modulates SH-SY5Y Differentiation and Susceptibility to Oxidative Stress-Dependent Cell Damage: Involvement in Oxotremorine-M-Mediated Neuroprotective Effects
Source: MDPI journal article supplement (doi:10.3390/antiox12030687), 2023-03-10

SUPPLEMENTARY INFORMATION

Figure S1

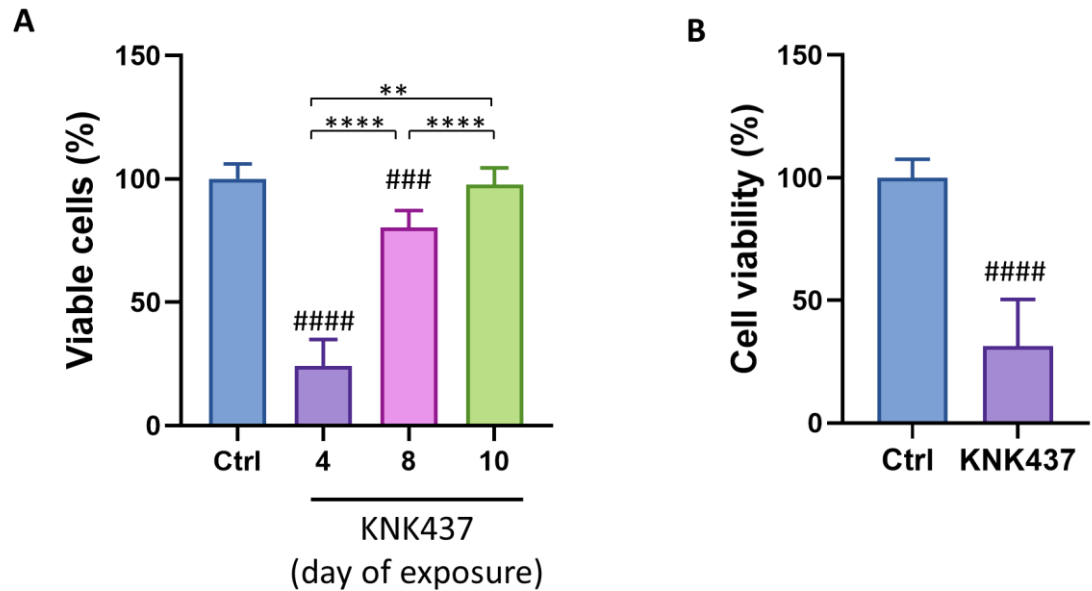

**Figure S1:** Effects of KNK437 treatment on SH-SY5Y viability. A) Cell viability of fully differentiated cells (11 days) treated with KNK437 (50  $\mu$ M) at day of differentiation 4, 8 and 10, evaluated by Trypan Blue exclusion method. B) Viability of cells differentiated for 7 days treated with KNK437 (50  $\mu$ M) at day of differentiation 4, evaluated by MTT test. Tukey test in A): ### $p < 0.001$ , #### $p < 0.0001$  as compared to control (Ctrl) non-treated group, \*\* $p < 0.01$ , \*\*\*\* $p < 0.0001$ ; t-test in B) #### $p < 0.0001$  as compared to Ctrl non-treated group.

Figure S2

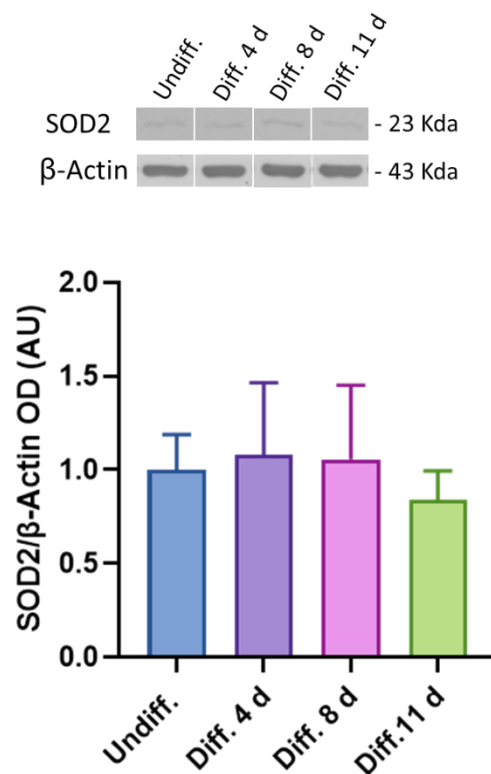

**Figure S2:** SOD2 expression in SH-SY5Y differentiation. Representative images of SOD2 and  $\beta$ -Actin western blotting bands and histogram of SOD2 normalized to  $\beta$ -Actin optical density (OD) in undifferentiated (Undiff.) cells and cells differentiated (Diff.) for 4, 8 and 11 days. Tukey test:  $p>0.05$ .

Original western blotting images of biological replicates used for statistical analysis. Arrows indicate the bands selected for the representative images shown in the manuscript.

Figure 2 A-B

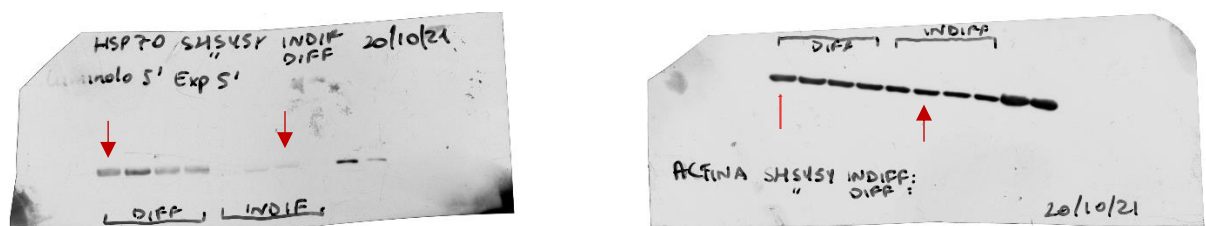

Figure 2C-D

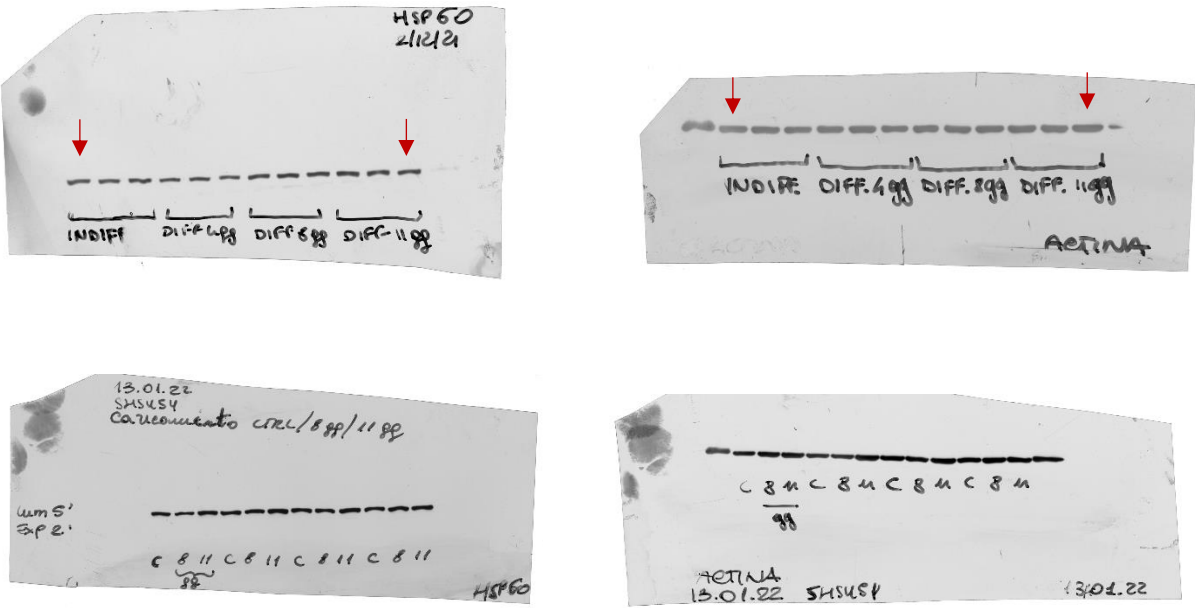

Figure 2E-F

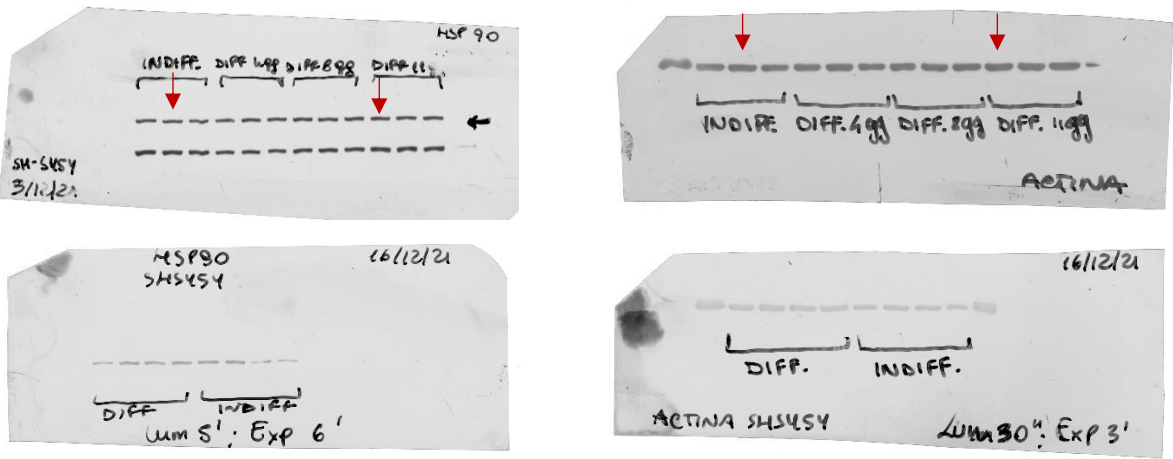

Figure 3A-B

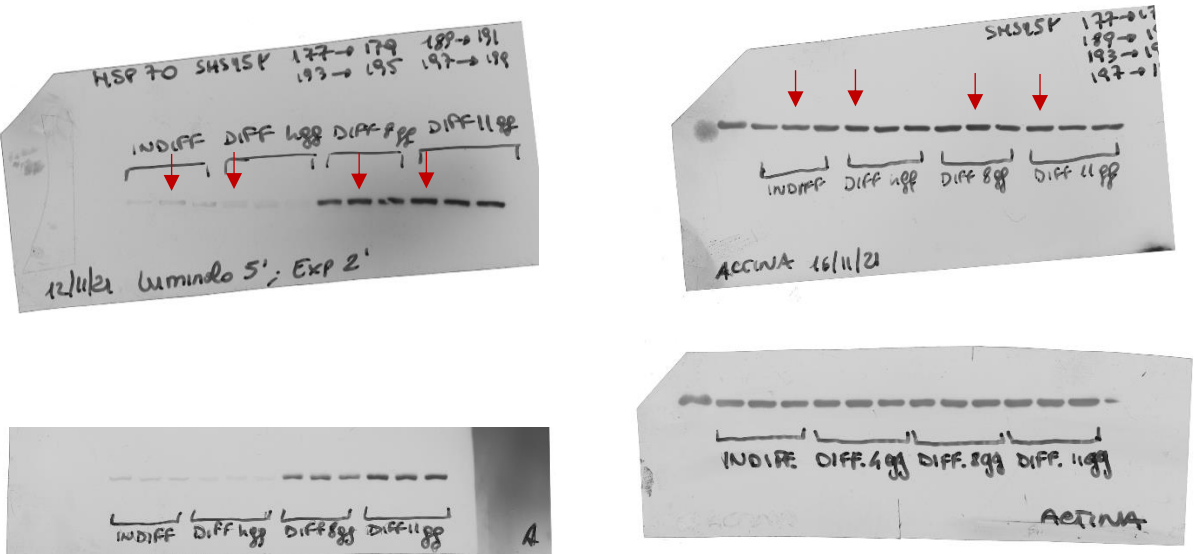

Figure 3C-D

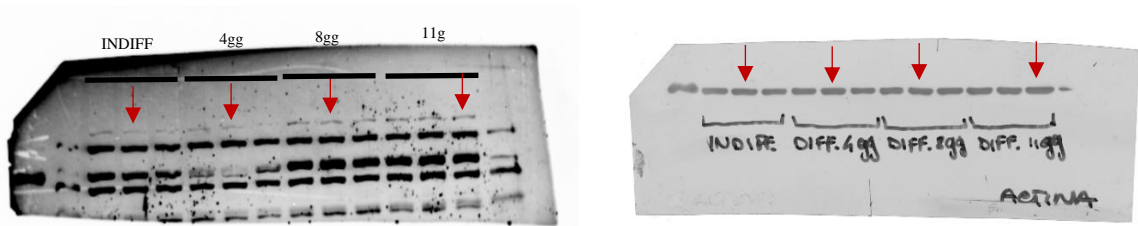

Figure 3E-F

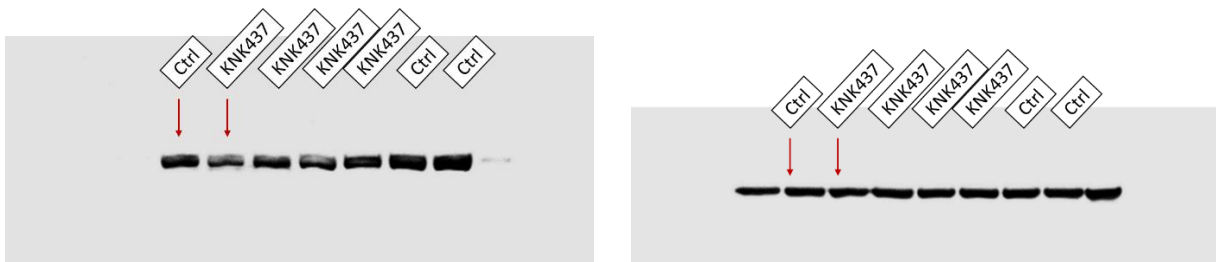

Figure 4D-E

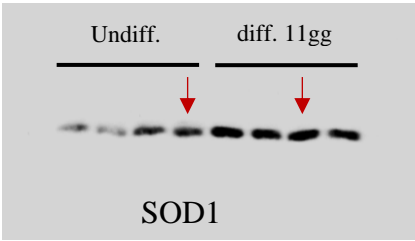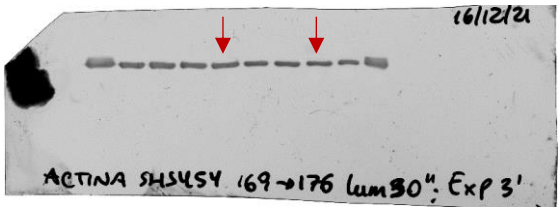

Figure 4F-G

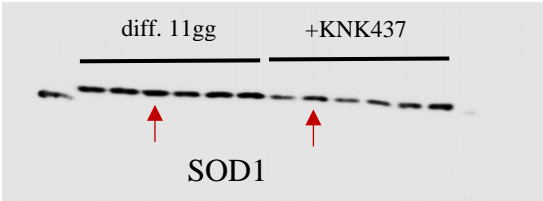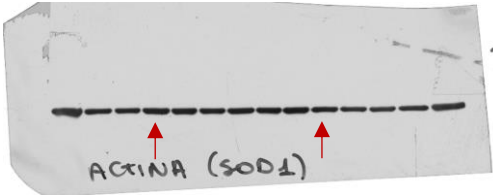

Figure 5A-B

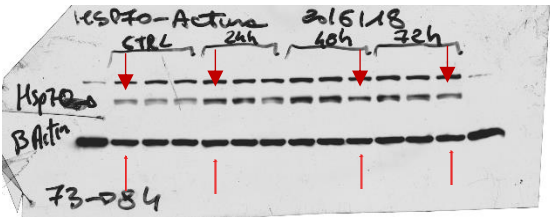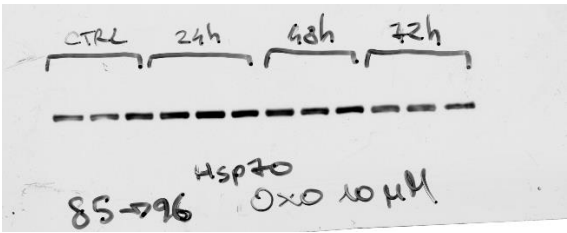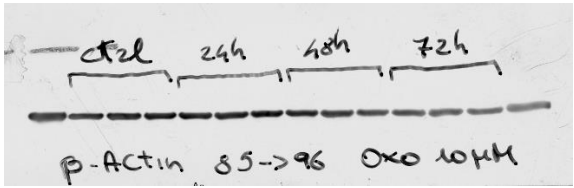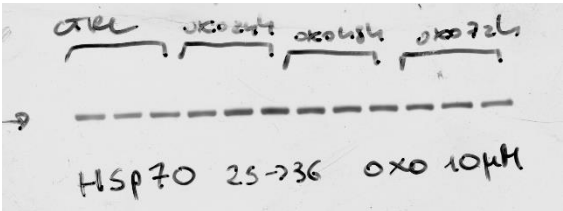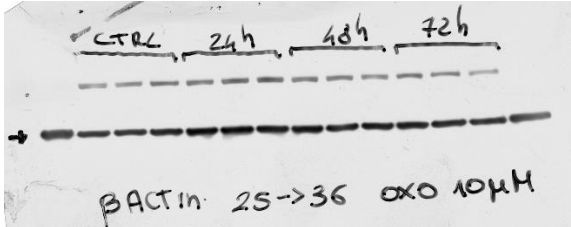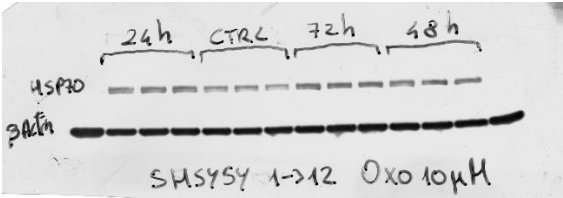

Figure 5C-D

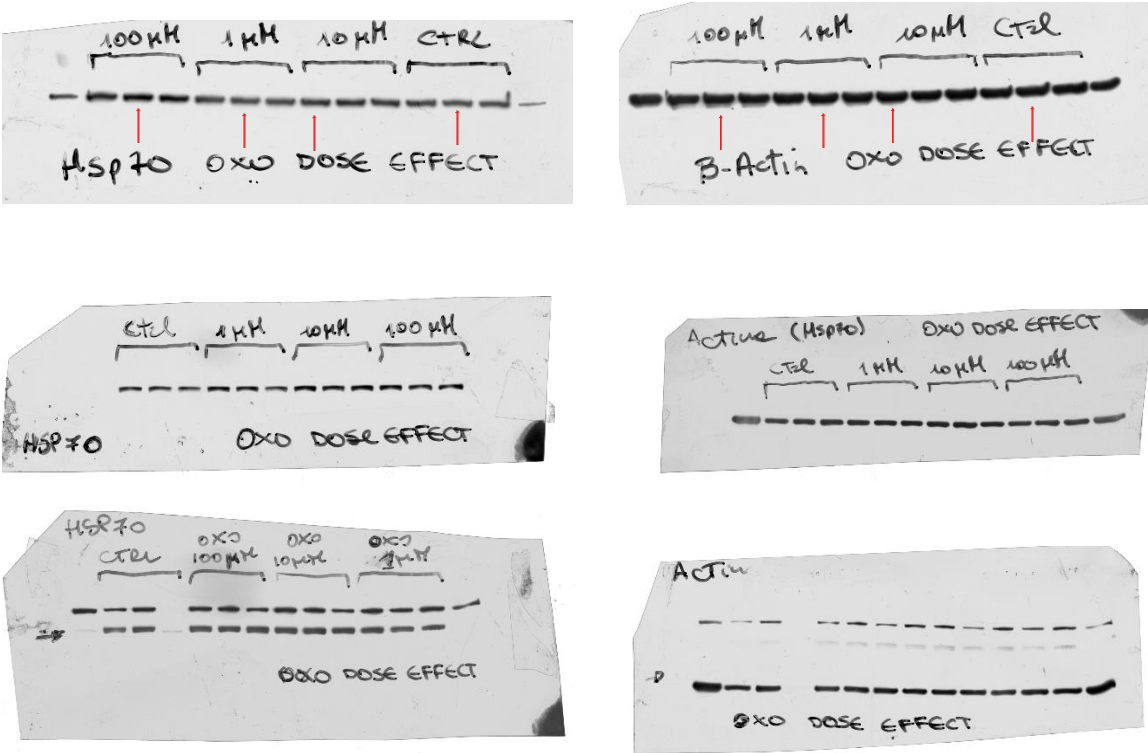

Figure 5G-H

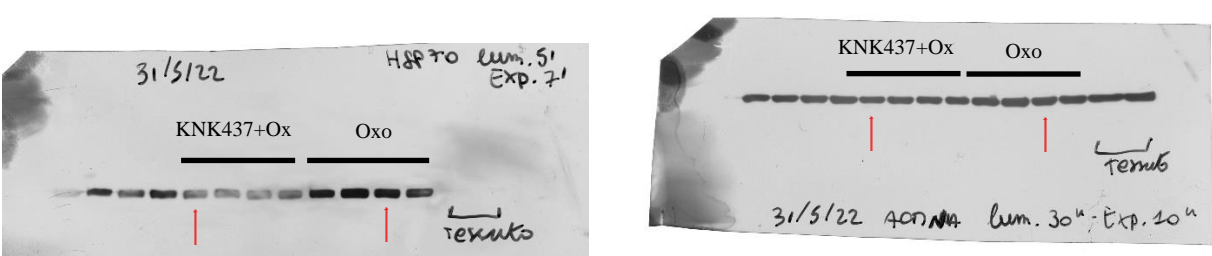

Figure 5E-F

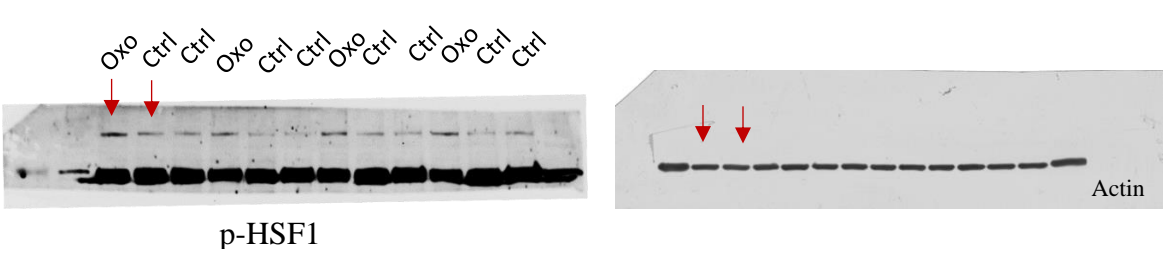

Figure 7A-B

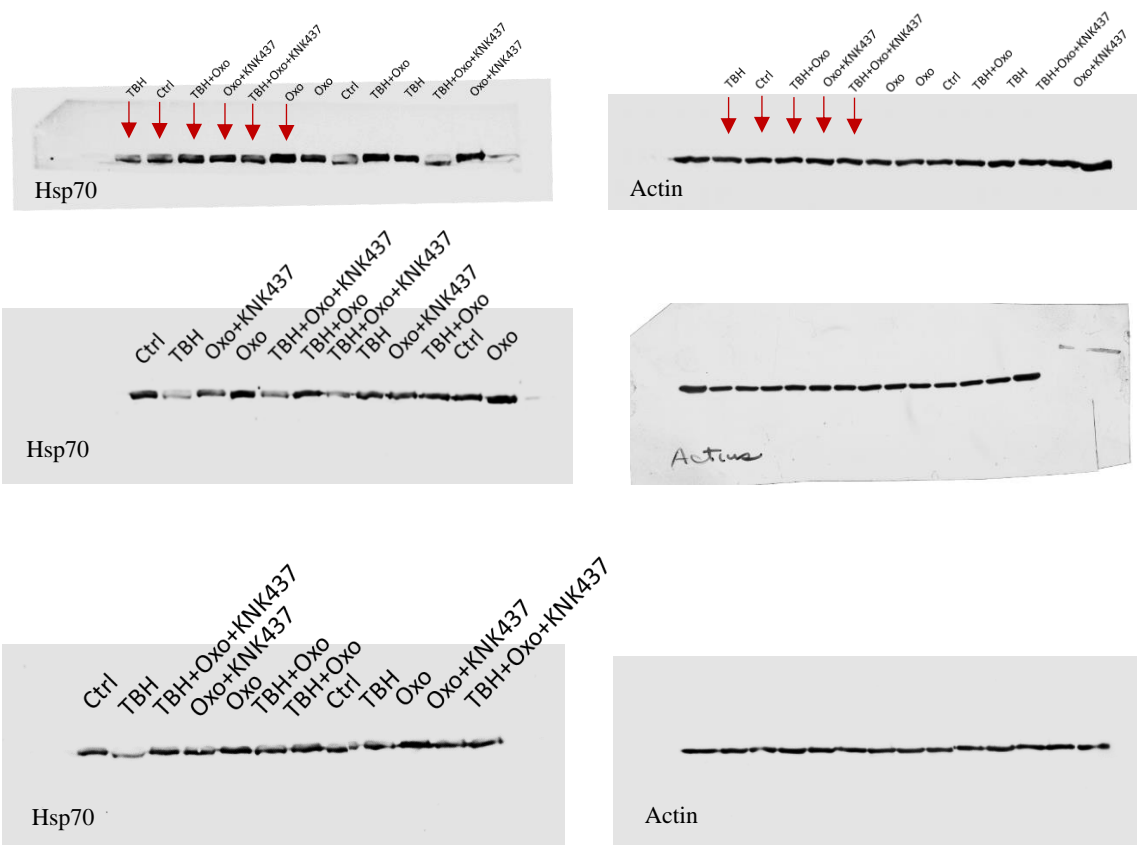

Figure 7 C-D

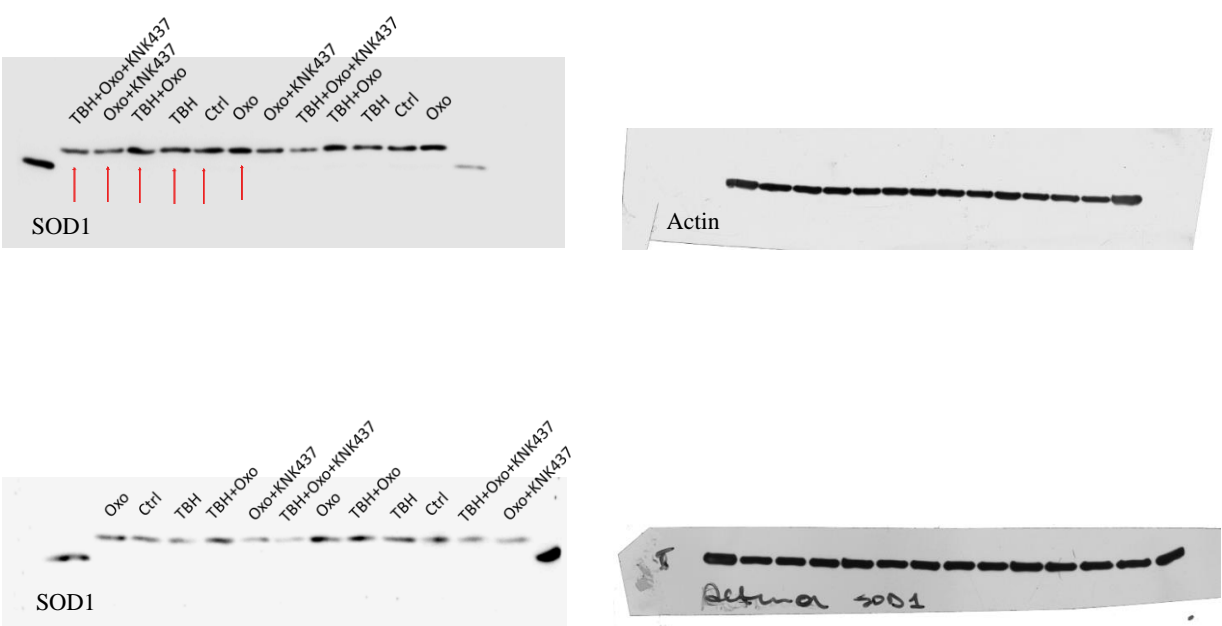

Figure S2

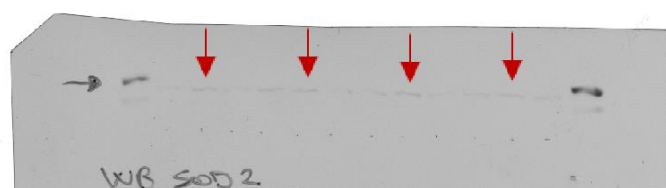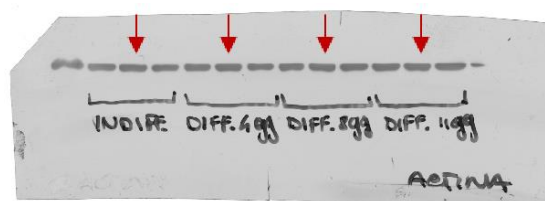

Supplement: s1 [file s1]
